# Supplementary material for: The Lovisa Stratiform Zn-Pb Deposit, Bergslagen, Sweden: Structure, Stratigraphy, and Ore Genesis
Source: Oxford University Press journal article supplement (doi:10.5382/econgeo.2018.4567), 2018-04-14
Supplement: 699electronic+supplement+-+emp+data.xls [file 699electronic+supplement+-+emp+data.xls]

## Sheet: Chlorite
Eletronic Supplement A. Chlorite compositions
Sample no.		LK20150081	LK20150029	LV2
Unit		Pyritic rhyolitic silt-sandstone	Laminated pyritic rhyolitic silt-sandstone	Sphalerite Ore
Setting		Upper Footwall	Upper Footwall	Lovisa ore horizon
Comment		Chlorite-felspar-pyrite alteration patch.	Chlorite-felspar-pyrite alteration patch.	Groundmass
n		6	3	3
Weight.%
SiO2		25.47	27.2167	26.9767
Al2O3		19.47	18.28	18.7967
Cr2O3		0.00348333	0.0122	0.0127667
TiO2		0.0449333	0.0648667	0.0589
FeO-tot		31.2767	24.75	26.8633
MnO		1.05448	1.26153	1.11793
MgO		10.7767	15.9267	13.3133
CaO		0.00846667	0.0201333	0.0607
NiO		0.0211667	0.0216333	0.0059
Na2O		0.0210667	0.0446667	0.1476
K2O		0.0211667	0.0328667	0.146
F		0.0563333	0.172367	0.192933
Cl		0.0148	0.0170667	0.0381333
Tot-Raw		88.2448	87.6572	87.515
H2O*		10.9645	11.2479	11.0515
F,Cl=O*		0.0270608	0.0764338	0.0898471
Tot-Corr**		99.2534	99.0181	98.7077
Number of ions based on 20 cations, 28 oxygen and 16 OH sites
Si		5.55694	5.76043	5.80244
Al-IV		2.44306	2.23957	2.19756
Al-VI		2.56407	2.32092	2.56804
Ti		0.00737155	0.0103234	0.00952622
Fe3+		0	0	0
Fe2+		5.70598	4.38024	4.83153
Mg		3.50436	5.02414	4.26802
Mn		0.194852	0.226139	0.203655
Ca		0.00197898	0.00456518	0.0139873
Na		0.0089104	0.0183273	0.0615464
K		0.00589072	0.00887329	0.0400575
F		0.0388674	0.115368	0.131233
Cl		0.00547199	0.00612133	0.0138996
* Calculated
** Corrected for Cl,F=O and Fe2+/Fe3+

## Sheet: Biotite
Electronic supplement B. Biotite composition in Lovisa iron formation
Sample no.		LK20150033
Unit		Lovisa iron formation
Setting		Footwall
n		5
Weight.%
SiO2		30.324
Al2O3		13.956
Cr2O3		0.00888
TiO2		0.97782
FeO-tot		34.308
MnO		1.35684
MgO		3.718
BaO		3.18
CaO		0.05812
NiO		0.03
Na2O		0.0938
K2O		5.12
F		0.0917
Cl		1.562
Tot-Raw		93.1294
H2O*		2.96823
F,Cl=O*		0.391002
Tot-Corr**		97.3604
Number of ions based on 16 cations, 22 oxygen and 4 OH sites
Si		5.33528
Al-IV		2.66472
Al-VI		0.229598
Ti		0.129364
Fe3+		0
Fe2+		5.04742
Mg		0.974983
Ba		0.21923
Mn		0.202188
Ca		0.0109551
Na		0.0319939
K		1.14908
F		0.0917
Cl		1.562
* Calculated
** Corrected for Cl,F=O and Fe2+/Fe3+

## Sheet: Garnet
Electronic supplement C. Garnet compositions
Sample no.		LK20150033	LK20150024	1501-163.5	LK20150086	LK20150086
Unit		Lovisa IF	Lovisa IF	Sphalerite Ore	Hangingwall BIF	Hangingwall BIF
Setting		Footwall	Footwall	Lovisa ore zone	Upper hangingwall	Upper hangingwall
Comment		Porphyroblast in amphibole-garnet calc-silicate rock	Anhedral	Porphyroblast	Anhedral, BSE dark	Anhedral, BSE bright
n		10	6	10	3	3
Weight.%
SiO2		36.53	37.36	37.07	36.81	35.47
Al2O3		19.91	18.57	21.35	17.7	7.61
Cr2O3		0.03	0.02	0.03	0.01	0.02
TiO2		0.19	0.03	0.08	0.09	0.05
Fe2O3-tot		21.11	14.86	19.3	17	23.8
MnO		13.51	17.62	13.58	11.8	3.81
MgO		0.4	0.54	1	0.5	0.06
CaO		10.08	12.89	9.42	17.55	29.62
Tot-Raw		101.74	101.88	101.83	101.47	100.44
Tot-Corr**		99.85	100.82	99.92	100.4	100.24
Number of ions based on based on 24 O and 16 cations
Si		5.91	5.98	5.94	5.88	5.82
Al-IV		0.09	0.02	0.06	0.12	0.18
Al-VI		3.71	3.48	3.96	3.22	1.3
Ti		0.02	0	0.01	0.01	0.01
Fe3+		0.27	0.51	0.02	0.77	2.7
Fe2+		2.3	1.27	2.3	1.28	0.24
Mg		0.1	0.13	0.24	0.12	0.01
Mn		1.85	2.39	1.84	1.6	0.53
Ca		1.75	2.21	1.62	3.01	5.21
Garnet end-member calculation
Uvarovite		0.08	0.06	0.08	0.04	0.06
Spessartine		30.86	39.79	31	26.62	8.84
Pyrope		1.62	2.14	4	1.99	0.25
Almandine		38.41	21.25	38	21.29	4.08
Grossular		21.79	23.8	26	30.6	19.22
Andradite		7.24	12.96	1	19.46	67.55
* Calculated
** Corrected after Fe2+/Fe3+ calculation

## Sheet: Feldspar
Electronic supplement D. Feldspar compositions
Sample no.		LK20150081	LK20150029	LV2	LK20150086
Unit		Pyritic rhyolitic silt-sandstone	Laminated pyritic rhyolitic silt-sandstone	Sphalerite ore	Hangingwall BIF
Setting		Upper footwall	Upper footwall	Lovisa ore zone	Upper hangingwall
Comment		Chlorite-felspar-pyrite alteration patch.	Chlorite-felspar-pyrite alteration patch.	Groundmass.	Groundmass.
n		2	5	5	5
Weight.%
SiO2		46.02	62.528	63.728	64.106
Al2O3		24.24	18.556	18.322	18.196
Na2O		0.7697	0.48994	0.53146	0.32886
K2O		5.74	14.966	15.644	16.058
BaO		24.105	2.446	0.24564	0.18892
FeO-tot		0.0855639	0.0199526	0.201567	0.140949
Tot		100.96	99.0059	98.6727	99.0187
Number of ions based on 32 oxygen
Si		9.86847	11.9501	11.8578	11.9956
Al		6.12686	4.04965	4.1478	4.0133
Na		0.320041	0.193238	0.180158	0.11932
K		1.57035	3.74258	3.62091	3.83351
Ba		2.02575	0.0180516	0.181787	0.013854
Fe		0.0153454	0.0316117	0.00316457	0.0220582

## Sheet: Amphibole
Electronic supplement E. Amphibole compositions
Sample no.		LK20160101	LK20160101	LK20150033	LK20150024	1501-163.5	LK20150086
Unit		Lekeberg iron formation	Lekeberg iron formation	Lovisa iron formation	Lovisa iron formation	Sphalerite ore	Banded iron formation
Setting		Lower footwall	Lower footwall	Footwall	Footwall	Lovisa ore zone	Upper hangingwall
Comment		Pseudomorph after olivine	Pseudomorph after olivine	Main mass in amphibole-garnet calc-silicate rock	Subhedral porphytoblast	Subhedral porphytoblast	Subhedral porphytoblast
n		2	3	5	9	5	3
Weight.%
SiO2		54.865	56.9033	42.338	39.47	49.894	41.9833
Al2O3		0.08155	0.105333	8.904	11.2689	4.802	10.54
Cr2O3		0	0.0161	0.01416	0.00986667	0.03398	0.0113
TiO2		0	0.00493333	0.25512	0.100456	0.24852	0.356467
FeO-tot		9.26	5	25.836	24.8311	15.224	19.2733
MnO		4.69	0.927133	1.32764	2.26111	1.1766	1.53667
MgO		15.695	21.2433	4.738	4.76556	12.606	8.79
CaO		12.295	12.3233	11.55	11.6622	11.694	11.9133
BaO		NA	NA	0.07	0.02	NA	0.06
Na2O		0.0214	0.0242	0.6217	1.2468	0.46786	1.03087
K2O		0.01485	0.0119	1.536	1.72111	0.53924	1.91
F		0.02335	0.0247667	0.17872	0.129722	0.17728	0.557567
Cl		0.0063	0.0046	0.58032	0.552733	0.08594	0.1314
Tot-Raw		96.9228	96.5665	97.1206	97.3406	96.6944	97.3644
H2O*		2.05116	2.12366	1.67091	1.69944	1.9095	1.66094
F,Cl=O*		0.011254	0.011467	0.206179	0.179323	0.0940407	0.264435
Tot-Corr**		99.0239	98.7081	99.7191	100.137	98.7858	99.8681
Number of ions based on CAMP NORM (stoichiometric, Sum(Cations) = 15+Na+K, I.e. no Na on M4)
Si		7.9714	7.98605	6.67089	6.2246	7.42338	6.42725
Al-IV		0.0139662	0.0139459	1.32911	1.7754	0.576616	1.57275
Al-VI		0	0.00347918	0.324579	0.319394	0.265537	0.329228
Ti		0	0.000520617	0.030226	0.0119125	0.0278034	0.0410346
Fe3+		0.0344539	0	0.443701	0.703536	0.0141888	0.481149
Fe2+		1.09055	0.58677	2.96024	2.57096	1.87984	1.98607
Mn		0.577124	0.110203	0.17717	0.302012	0.148265	0.199244
Mg		3.39874	4.44359	1.11267	1.12015	2.79543	2.00565
Ca		1.91377	1.85287	1.94965	1.97037	1.86397	1.95391
Na		0.00602764	0.00658422	0.189902	0.381185	0.134947	0.305946
K		0.00275217	0.00213035	0.308712	0.346228	0.10234	0.372985
F		0.0107285	0.010992	0.0890511	0.0646952	0.0834116	0.269934
Cl		0.00155116	0.00109403	0.154952	0.147719	0.0216684	0.0340895
* Calculated
** Corrected for Cl,F=O and Fe2+/Fe3+

## Sheet: Epidote
Electronic supplement F. Epidote compositions
Sample no.		1501-163.5	LK20150086
Unit		Sphalerite ore	Banded iron formation
Setting		Lovisa ore zone	Upper hangingwall
Comment		Subhedral crystal in groundmass	Rim around feldspar
n		5	3
Weight.%
SiO2		39.02	37.33
Al2O3		29.09	22.3967
Cr2O3		0.01	0
TiO2		0	0.0291
Fe2O3-tot		5.5	14.47
MnO		0.1	0.333133
MgO		0.01	0.0283333
BaO		NA	0.01
CaO		23.72	23.7033
NiO		0.01	0.0119
Na2O		0.02	0
K2O		0.03	0.02
F		0	0.06
Cl		0	0.01
Tot-Raw		97.51	96.88
H2O*		1.93	1.85172
F,Cl=O*		0	0.0265163
Tot-Corr**		99.38	100.221
Number of ions based on 16 cations, 25 oxygen and 2 OH sites
Si		6.06	5.94922
Al		5.32	4.20715
Fe3+		0.57	1.73351
Fe2+		0.07	0
Mg		0.01	0.00671245
Mn		0.01	0.044979
Ca		3.94	4.04697
F		0	0.03
* Calculated
** Corrected for Cl,F=O and Fe2+/Fe3+
